# Supplementary material
Source: publisher site journal article supplement (https://jamanetwork.com/crawlprevention/governor?content=%2fErrors%2f404.aspx%3f404%3bhttp%3a%2f%2fjamanetwork.com%3a80%2fcontent%2fsuppl%2f2010%2f05%2f20%2f303.20.2058.DC1%2fJWE05058_05_26_2010.pdf)
Supplement: Supplementary file 1 [file governor]

Validate User


We are sorry, but we are experiencing unusual traffic at this time. Please help us confirm that you are not a robot and we will take you to your content.

Could not validate captcha. Please try again.

Take me to my Content
